# Supplementary material
Source: Springer Nature journal article supplement (https://www.springermedizin.de/resource/supplementary/12889_2013_6520_MOESM7_ESM.pdf/9498350)

$p_3=10$ 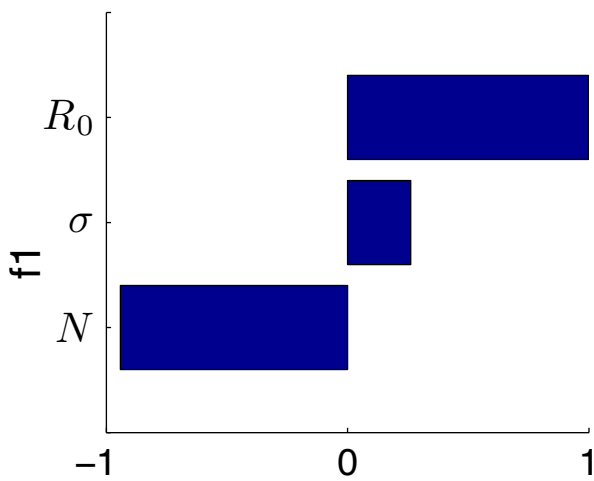 $p_3=100$ 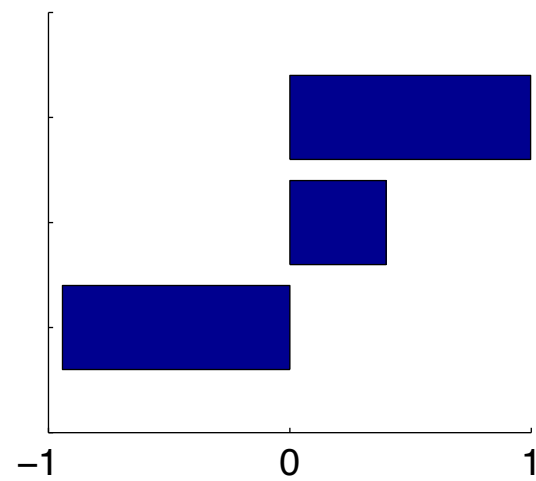 $p_3=1000$ 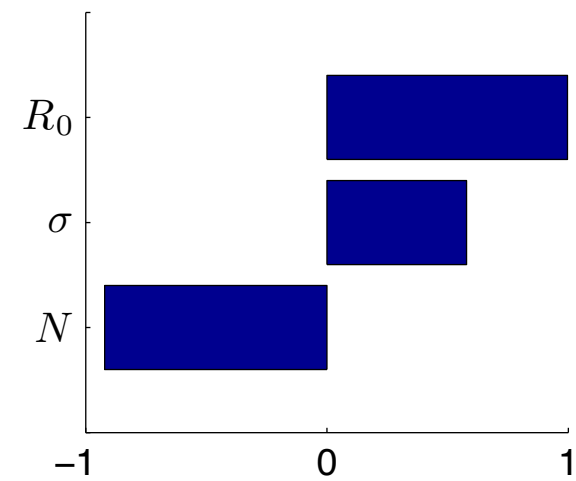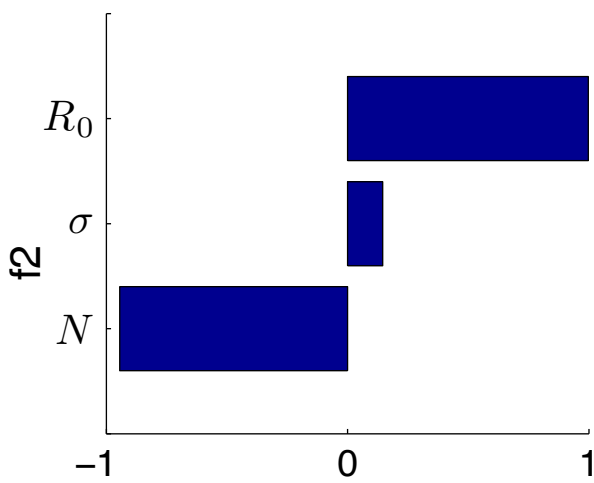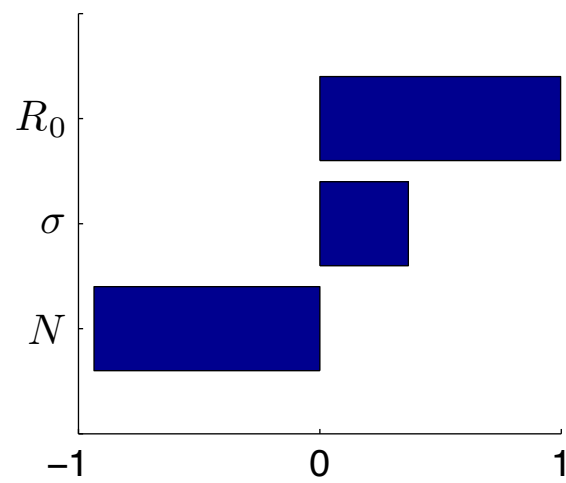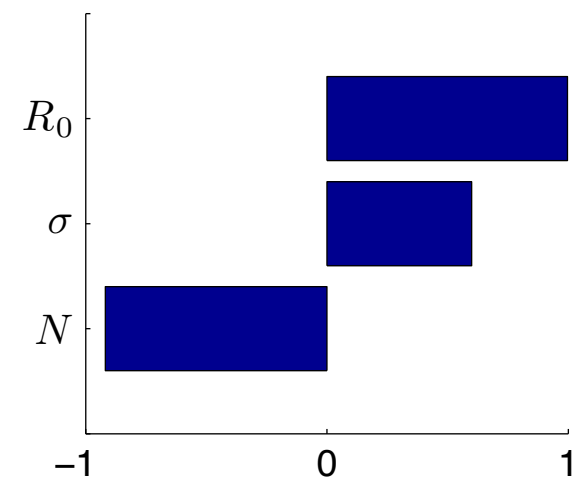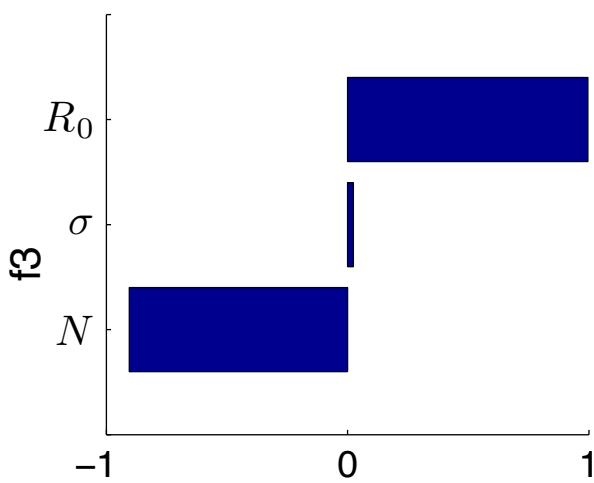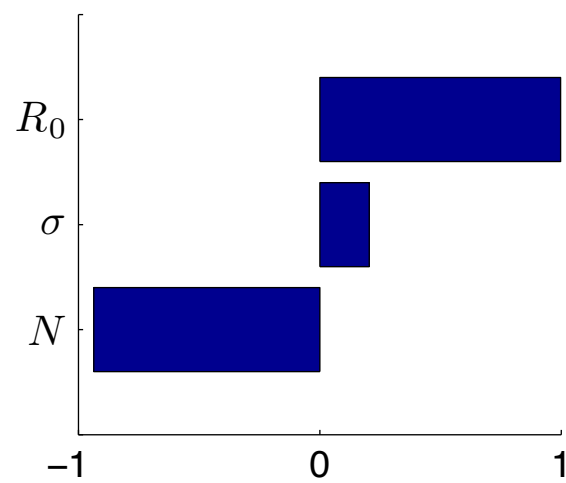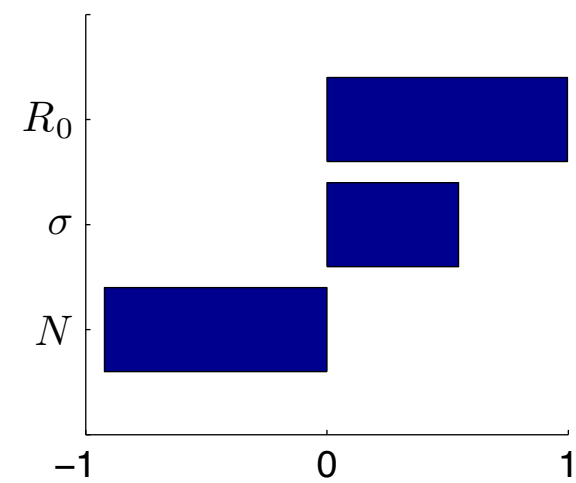

PRCC value

Supplement: MOESM7 [file 9498350]
